# Supplementary material for: Natural variation of a sensor kinase controlling a conserved stress response pathway in Escherichia coli
Source: PLOS journal article supplement (doi:10.1371/journal.pgen.1007101), 2017-11-15
Supplement: S5 (10.1371/journal.pgen.1007101.s005) [file journal.pgen.1007101.s005]

**S4 Table. Sequence evolution of *evgS* based on dN/dS analysis.**

|                         | All 10 <i>E. coli</i> isolates |                 |                    | Group A                                      |                                              |                                              | Group B2                                     |                                              |                                              |
|-------------------------|--------------------------------|-----------------|--------------------|----------------------------------------------|----------------------------------------------|----------------------------------------------|----------------------------------------------|----------------------------------------------|----------------------------------------------|
| Gene                    | dN <sup>a</sup>                | dS <sup>b</sup> | dN/dS <sup>c</sup> | dN                                           | dS                                           | dN/dS                                        | dN                                           | dS                                           | dN/dS                                        |
| <i>evgS</i>             | 0.0116                         | 0.1143          | 0.1013             | 0.0016 <sup>d</sup> ,<br>0.0006 <sup>e</sup> | 0.0051 <sup>d</sup> ,<br>0.0014 <sup>e</sup> | 0.3240 <sup>d</sup> ,<br>0.4409 <sup>e</sup> | 0.0009 <sup>f</sup> ,<br>0.0011 <sup>g</sup> | 0.0116 <sup>f</sup> ,<br>0.0152 <sup>g</sup> | 0.0802 <sup>f</sup> ,<br>0.0744 <sup>g</sup> |
| <i>evgS</i><br>(1-537)  | 0.0136                         | 0.1232          | 0.1101             | 0.0027                                       | 0.0114                                       | 0.2328                                       | 0.0006                                       | 0.0057                                       | 0.1131                                       |
| <i>evgS</i><br>(87-234) | 0.0146                         | 0.1269          | 0.1149             | 0.0059                                       | 0.0131                                       | 0.4529                                       | 0                                            | 0                                            | ND <sup>h</sup>                              |
| <i>evgA</i>             | 0                              | 0.0609          | 0                  | 0                                            | 0                                            | ND <sup>h</sup>                              | 0                                            | 0.0079                                       | 0                                            |
| <i>yfdE</i>             | 0.0064                         | 0.0965          | 0.0658             | 0                                            | 0.0105                                       | 0                                            | 0.0043                                       | 0.0498                                       | 0.0856                                       |
| <i>barA</i>             | 0.0004                         | 0.0671          | 0.0056             | 0                                            | 0.0031                                       | 0                                            | 0.0004                                       | 0.0388                                       | 0.0097                                       |
| <i>arcB</i>             | 0.0008                         | 0.0627          | 0.0134             | 0.0004                                       | 0                                            | ND <sup>h</sup>                              | 0.0003                                       | 0.0139                                       | 0.0239                                       |

<sup>a</sup>dN – Average number of substitutions per non-synonymous site

<sup>b</sup>dS – Average number of substitutions per synonymous site

<sup>c</sup>dN/dS – Ratio of rates of non-synonymous (dN) and synonymous (dS) substitutions; also known as Ka/Ks

<sup>d,f</sup> values corresponding to the *E. coli* strains included in this study belonging to phylogenetic groups A and group B2, respectively

<sup>e,g</sup> values corresponding to all the *E. coli* strains from phylogenetic groups A and B2, respectively, derived from the MLST-based tree (Lasaro, Liu et al. 2014)

<sup>h</sup>ND – Not determined

Lasaro, M., Z. Liu, et al. (2014). "Escherichia coli isolate for studying colonization of the mouse intestine and its application to two-component signaling knockouts." *J Bacteriol* **196**(9): 1723-1732.
